# Supplementary material
Source: bioRxiv or medRxiv preprint supplement (https://medrxiv.org/highwire/filestream/91609/field_highwire_adjunct_files/0/2020.07.30.20142687-1.pdf)
Supplement: Supplementary file [file 2020.07.30.20142687-1.pdf]

## Supplementary Methods

### Eligibility Criteria

#### *Inclusion criteria*

- a) Meet ACR/SLICC 2012 criteria for SLE
- b) Musculoskeletal symptoms deemed by the investigator to represent active SLE (patients need not have clinical synovitis but must have evidence to support inflammatory cause of symptoms (e.g. morning stiffness, raised inflammatory markers and no more likely alternative diagnosis for these symptoms such as osteoarthritis)
- c) Planned treatment with intramuscular glucocorticoids (this is typically expected to be 120mg Depomedrone as the most commonly used preparation and dose, but clinicians may choose to use an alternative preparation or dose that they consider equivalent for that patient)

#### *Exclusion criteria*

- a) Positive blood test for CCP (ever)
- b) Receiving an NSAID within 3 days prior to the intended baseline US date
- c) Receiving daily oral glucocorticoid greater than prednisolone 5mg (or equivalent), or have received IV/IM glucocorticoid in the past 3 months
- d) Received rituximab or cyclophosphamide in the past 6 months
- e) New or increased dose oral immunosuppressant therapy in the past 3 months (methotrexate, mycophenolate mofetil, mycophenolic acid, azathioprine, cyclosporine, cyclophosphamide, intravenous immunoglobulin, belimumab or other regular biologic therapy)

### Clinical Assessment

Clinical assessments were performed by a trained assessor blinded to ultrasound status and patient-reported outcomes. These included tender joint count (68 joints), swollen joint count (66 joints), physician musculoskeletal disease activity visual analogue scale (VAS; 0-100mm), physician global assessment VAS (0-100mm), BILAG-2004[1], SLEDAI-2K[2]. Local diagnostic laboratories were used to measure full blood count, liver function tests, urea and electrolytes, anti-nuclear antibodies ANA (including subspecificities), immunoglobulin titres, complement C3 and C4, erythrocyte sedimentation rate and C-reactive protein, urine analysis. At baseline, physicians were also asked to report which clinical inflammatory features were present (morning stiffness, distribution, symmetry, swelling, serology, other lupus features, prior therapy response, Jaccoud's arthropathy or other). They also recorded any other musculoskeletal disorders. For fibromyalgia, we did not apply fibromyalgia diagnostic criteria or assessments of tenderness because an essential criterion of the 2010 ACR criteria is that patients do not have another disorder that could explain the symptoms, and all of our patients were deemed to have active musculoskeletal SLE[3]. We therefore asked physicians to give their overall opinion on whether there was concurrent fibromyalgia and also to document their reasons for this assessment (including fatigue, waking unrefreshed, cognitive symptoms, somatic symptoms, or other). Osteoarthritis (OA) features were documented based

on the ACR criteria for hand osteoarthritis (excluding joint swelling components), deformity and radiographic features (i.e. hard tissue enlargement of 2 or more joints, hard tissue enlargement of DIPs, deformities consistent with OA, previous radiographic evidence in symptomatic sites, or other).

### **Patient reported outcomes**

Patients were blinded to both clinical assessment and ultrasound findings and reported visual analogue scales for general health, musculoskeletal disease activity, musculoskeletal pain, fatigue, morning stiffness (all 0-100mm). They also reported morning stiffness duration, HAQ-DI[4], LupusQoL[5] and L-QoL[6]. Patients also completed a 15 point Likert scale for response to steroid (ranging from -7 to +7) which was used in the first phase analysis. Patient acceptable symptom state as collected. Patients were asked "Think about all the ways your joints, muscles and/or tendons have affected you during the last 48 hours. If your joints, muscles and/or tendons were to remain the next few months as you were during the last 48 hours, would this be acceptable or unacceptable to you?".

### **Ultrasound assessment**

Ultrasound assessments were performed by a trained sonographer blinded to the clinical assessment and patient-reported outcomes. It included both hands and wrists including radiocarpal (RCJ), inter-carpal (ICJ), ulno-carpal(UCJ), 2<sup>nd</sup> to 5<sup>th</sup> metacarpophalangeal (MCP) joints, 2<sup>nd</sup> to 5<sup>th</sup> proximal interphalangeal (PIP) joints and extensor carpi ulnaris (ECU), extensor wrist tendons (EWT) (1<sup>st</sup>-5<sup>th</sup> compartments) and 2<sup>nd</sup> to 5<sup>th</sup> flexor digitorum tendons (FDT) in all visits. Ultrasound frequency was in the range of 12-18 MHz and multilinear probe was used. PD was assessed with the highest gain level without background noise, pulse repetition frequency of 750-1000 Hz (depend on the machine use musculoskeletal settings for small joint examination) and medium wall filter.

Each joint was assessed for GS and PD. Each tendon was assessed for GS and PD tenosynovitis. The GS and PD were scored using the OMERACT definitions and semi-quantitative 0–3 scale. GS scoring was: 0 = no synovial hypertrophy, 1 = mild hypertrophy, 2 = moderate hypertrophy and 3 = severe hypertrophy. PD scoring was: 0 = absence of signal, no intra-articular flow; 1 = mild hyperaemia, one or two vessels signal (including one confluent vessel); 2 = moderate hyperaemia, (>grade 1) and <50% of the GS area; 3 = marked hyperaemia, vessels signal in more than half of the synovial area. Tenosynovitis was defined according to the OMERACT criteria and the GS and PD signal scored using semi-quantitative 0–3 scale system (0 = normal, 1 = mild, 2 = moderate and 3 = severe).

### **Patient and public involvement**

Initial development of the research question took place at a meeting involving patients with lupus, patients with other RMDs, partners and family members, and members of Lupus UK. Previous work in lupus arthritis was presented [7-10]. The identification of lupus patients who may be under-treated for their arthritis and the development of better tools for clinical trials were agreed as overall objectives. The USEFUL study was designed to answer these questions. PPI partners were involved in the decisions about the study visits and assessments, including detailed work on the detail and burden of patient-reported outcomes. The benefit of feeding back results of scans and blood tests to participants was emphasized. Although this is not possible during the study (because of blinding and scientific integrity), we

incorporated feedback at the week 6 visit. A key aspect of our design was that primary endpoint selection was predicated on a patient-reported outcome. This ensured that our results would guide treatment in a way that was relevant to patients. A grant proposal was submitted to LupusUK and lay review was included in that assessment. A detailed protocol, patient information sheet and patient reported outcomes CRF were designed and reviewed and modified by a PPI partner to ensure readability and ease of completion. During the study, a trial steering committee included two patient members. This work included review of study progress and recruitment strategy. For dissemination, a lay summary of the study concept, design and results has been prepared working with one of the patient members of the TSC. This will be submitted to the LupusUK *News and Views* magazine.

### **Pilot phase analysis and selection of primary endpoint**

The primary objective was to test the hypothesis that clinical response would be better in patients with abnormal ultrasound. Because the change in clinical variables, or the most responsive clinical variable, was not previously known, we chose a 2-phase design with internal pilot. We required accurate estimates of the change in each of the clinical variables at the group level, and of the proportion of patients with active US (GS  $\geq 2$  and/or PD  $\geq 1$ ) present at baseline (estimated 60% from previous work)[10]. Recent recommendations for pilot and feasibility studies recommend that if a binary outcome is to be estimated, a sample size of 60 is the best trade-off between maximising the accuracy of the estimate and minimising the number of patients included. Required sample sizes for the estimation of Kendall's tau-a to within a confidence interval of  $\pm 0.15$  are  $n=35$  to  $n=70$ , assuming the value is between 0.2 and 0.6 (plausible values for the associations between the clinical variables and the patient-reported change in their symptoms) thus performing the interim analysis in the first  $n=70$  for phase 1 will be sufficient to meet both objectives. We therefore performed a blinded analysis of clinical data in the first 70 patients. Longitudinal ultrasound data were not analysed in this phase. The rate of ultrasound activity (presence of any joint scoring GS  $\geq 2$  and/or PD  $\geq 1$ ) at baseline was calculated at the group level. Changes in each of the candidate primary outcomes was correlated with the Likert scores for response to therapy at both 2 and 6 weeks. The candidate outcome with the strongest association was selected as the primary outcome; the visit at which the strongest association is identified was selected as the primary endpoint. The baseline mean and follow-up standard deviation of the chosen outcome calculated in all patients was used to calculate a revised sample size, taking into account the estimated rate of ultrasound activity.

EMS VAS at week 2 was the most strongly correlated with patient-reported change in pain. At  $\alpha=0.05$ ,  $1-\text{Beta}=0.8$  we required 130 patients in total to show a difference of 20% of the baseline value in EMS VAS at 2 weeks between those with active US in at least one joint and those without active US (allowing for 10% dropout).

### **Analysis of baseline data**

Within categories of the musculoskeletal domains of the existing instruments (SLEDAI-2K-MSK score 0 or 4; BILAG (2004) (MSK-BILAG) A, B, C, D/E) each of the following musculoskeletal-specific variables were summarized at baseline: tender joint count (68 joints), swollen joint count (66 joints), patient's painful joint count,

patient pain VAS, patient musculoskeletal disease activity VAS, physician musculoskeletal disease activity VAS, health assessment questionnaire disability index (HAQ-DI), severity of early morning stiffness VAS, duration of early morning stiffness, total scores for ultrasound grey scale, power Doppler and tenosynovitis and ultrasound-detected presence of osteophytes in the hands and wrists.

The following non-specific outcomes were summarised at baseline within categories of the musculoskeletal domains of the existing instruments (SLEDAI-2K-MSK score 0 or 4; BILAG (2004) merged ABC vs DE), further split by the categories of any other domains found to be involved in at least 12 patients (a minimum usually stipulated for accurate estimation of a quantity in pilot studies): physician's global VAS, patient fatigue VAS, erythrocyte sedimentation rate (ESR), Ig titres, complement titres.

### Internal pilot phase analysis and identification of primary efficacy variable

The pilot phase analysis included the first 70 patients. Patient Likert scale responses to the question “Since you have been given treatment has your joint and muscle pain been...” generally indicated improvement and are shown in Figure S1.

Of the candidate primary outcomes, at both week 2 and 6, EMS VAS was the most strongly correlated with patient-reported change in pain (Kendall’s Tau=0.291, Table S). The correlation was strongest at week 2. This was also the case for EMS (mins) and patient-reported painful joint count; for the remaining variables, stronger associations were found at week 6 than week 2. The primary endpoint for the main trial was therefore defined as EMS VAS (mm) at 2 weeks; EMS VAS at 6 weeks, and the remaining candidate variables at both 2 and 6 weeks, were deemed secondary endpoints. At alpha=0.05, 1-beta=0.8 we required 130 patients in total to show a difference of 20% of the baseline value in the primary endpoint between those with active US in at least one joint and those without active US.

**Table S1: Kendall's tau-a correlations with patient-reported change in pain**

| Variable                           | W2           | W6    |
|------------------------------------|--------------|-------|
| TJC68                              | -0.036       | 0.154 |
| SJC66                              | -0.070       | 0.125 |
| Physician MSK Disease Activity VAS | 0.049        | 0.117 |
| SLEDAI MSK                         | 0.053        | 0.157 |
| BILAG MSK                          | 0.021        | 0.150 |
| HAQ-DI                             | 0.062        | 0.124 |
| Patient MSK Disease Activity VAS   | 0.117        | 0.153 |
| MSK Pain VAS                       | 0.232        | 0.088 |
| EMS VAS                            | <b>0.291</b> | 0.159 |
| EMS mins                           | 0.279        | 0.070 |
| Painful Joint Count                | 0.135        | 0.147 |

**Table S2: Baseline MSK-specific SLE characteristics**

Population: Full analysis set.

All values reported as median (IQR), range, except for BILAG MSK and SLEDAI MSK which are reported as n/N (%).

|                                         | All patients                     | US activity at baseline          |                                  |                  |
|-----------------------------------------|----------------------------------|----------------------------------|----------------------------------|------------------|
|                                         |                                  | Inactive                         | Active                           |                  |
|                                         | N=133                            | N=55                             | N=78                             |                  |
| EMS VAS (mm)                            | 73.0 (57.0, 87.0), 0.0 to 100.0  | 67.0 (48.0, 83.0), 2.0 to 99.0   | 75.5 (63.0, 92.0), 0.0 to 100.0  | z=-2.55, p=0.011 |
| EMS duration (mins)                     | 90.0 (30.0, 120.0), 0.0 to 600.0 | 70.0 (30.0, 120.0), 0.0 to 360.0 | 90.0 (30.0, 150.0), 0.0 to 600.0 | z=-1.02, p=0.306 |
| Tender 68 joint count                   | 17.0 (7.0, 28.0), 0.0 to 68.0    | 15.0 (4.0, 27.0), 0.0 to 68.0    | 19.0 (10.0, 31.0), 0.0 to 68.0   | z=-2.21, p=0.027 |
| Swollen 66 joint count                  | 1.0 (0.0, 4.0), 0.0 to 32.0      | 0.0 (0.0, 0.0), 0.0 to 10.0      | 3.0 (1.0, 6.0), 0.0 to 32.0      | z=-6.52, p<0.001 |
| Patient painful joint count             | 16.0 (9.0, 28.0), 0.0 to 42.0    | 11.0 (7.0, 20.0), 0.0 to 40.0    | 22.0 (14.0, 32.0), 1.0 to 42.0   | z=-3.84, p<0.001 |
| Physician MSK Disease Activity VAS (mm) | 33.0 (21.0, 49.0), 0.0 to 90.0   | 24.0 (15.0, 36.0), 0.0 to 75.0   | 39.5 (30.0, 55.0), 13.0 to 90.0  | z=-4.86, p<0.001 |
| HAQ-DI score                            | 1.4 (0.6, 2.0), 0.0 to 3.0       | 1.4 (0.3, 1.8), 0.0 to 2.8       | 1.4 (0.8, 2.1), 0.0 to 3.0       | z=-1.82, p=0.069 |
| Patient MSK disease activity VAS (mm)   | 65.0 (32.0, 79.0), 2.0 to 95.0   | 54.0 (28.0, 75.0), 7.0 to 92.0   | 70.5 (37.0, 81.0), 2.0 to 95.0   | z=-1.87, p=0.061 |
| MSK pain VAS (mm)                       | 63.0 (47.0, 74.0), 5.0 to 99.0   | 57.0 (34.0, 69.0), 10.0 to 93.0  | 67.5 (53.0, 75.0), 5.0 to 99.0   | z=-2.72, p=0.007 |
| Total grey scale (joints)               | 5.0 (2.0, 9.0), 0.0 to 49.0      | 1.0 (0.0, 4.0), 0.0 to 10.0      | 7.0 (5.0, 11.0), 2.0 to 49.0     | z=-7.67, p<0.001 |
| Total power Doppler (joints)            | 0.0 (0.0, 1.0), 0.0 to 34.0      | 0.0 (0.0, 0.0), 0.0 to 0.0       | 0.0 (0.0, 2.0), 0.0 to 34.0      | z=-6.00, p<0.001 |
| Total osteophyte (joints)               | 0.0 (0.0, 0.0), 0.0 to 19.0      | 0.0 (0.0, 1.0), 0.0 to 8.0       | 0.0 (0.0, 0.0), 0.0 to 19.0      | z=0.88, p=0.379  |
| Total erosion score (joints)            | 0.0 (0.0, 0.0), 0.0 to 44.0      | 0.0 (0.0, 0.0), 0.0 to 1.0       | 0.0 (0.0, 0.0), 0.0 to 44.0      | z=-1.86, p=0.063 |
| Total OMERACT/EULAR GSPD score (joints) | 5.0 (2.0, 9.0), 0.0 to 49.0      | 1.0 (0.0, 4.0), 0.0 to 10.0      | 7.0 (5.0, 11.0), 2.0 to 49.0     | z=-7.67, p<0.001 |

USEFUL Study I: Musculoskeletal ultrasound identifies patients with lupus arthritis with better response to therapy: Supplementary material

|                                                  | All patients                |  | US activity at baseline     |                             |                      |
|--------------------------------------------------|-----------------------------|--|-----------------------------|-----------------------------|----------------------|
|                                                  |                             |  | Inactive                    | Active                      |                      |
|                                                  | N=133                       |  | N=55                        | N=78                        |                      |
| Total amended OMERACT/EULAR GSPD score (joints)  | 4.0 (1.0, 7.0), 0.0 to 36.0 |  | 1.0 (0.0, 4.0), 0.0 to 10.0 | 6.0 (4.0, 9.0), 1.0 to 36.0 | z=-6.51, p<0.001     |
| Total grey scale (tendons)                       | 0.0 (0.0, 1.0), 0.0 to 21.0 |  | 0.0 (0.0, 0.0), 0.0 to 7.0  | 0.0 (0.0, 2.0), 0.0 to 21.0 | z=-3.52, p<0.001     |
| Total power Doppler (tendons)                    | 0.0 (0.0, 0.0), 0.0 to 20.0 |  | 0.0 (0.0, 0.0), 0.0 to 6.0  | 0.0 (0.0, 1.0), 0.0 to 20.0 | z=-3.74, p<0.001     |
| Total OMERACT/EULAR GSPD score (tendons)         | 0.0 (0.0, 1.0), 0.0 to 21.0 |  | 0.0 (0.0, 0.0), 0.0 to 8.0  | 0.0 (0.0, 2.0), 0.0 to 21.0 | z=-3.51, p<0.001     |
| Total amended OMERACT/EULAR GSPD score (tendons) | 0.0 (0.0, 1.0), 0.0 to 20.0 |  | 0.0 (0.0, 0.0), 0.0 to 7.0  | 0.0 (0.0, 1.0), 0.0 to 20.0 | z=-3.47, p=0.001     |
| BILAG MSK score                                  |                             |  |                             |                             |                      |
| D/E                                              | 2/133 (2)                   |  | 2/55 (4)                    | 0/78 (0)                    | chisq=26.54, p<0.001 |
| C                                                | 65/133 (49)                 |  | 40/55 (73)                  | 25/78 (32)                  |                      |
| B                                                | 52/133 (39)                 |  | 10/55 (18)                  | 42/78 (54)                  |                      |
| A                                                | 14/133 (11)                 |  | 3/55 (5)                    | 11/78 (14)                  |                      |
| SLEDAI MSK domain score                          |                             |  |                             |                             |                      |
| 0                                                | 55/133 (41)                 |  | 36/55 (65)                  | 19/78 (24)                  | chisq=22.46, p<0.001 |
| 4                                                | 78/133 (59)                 |  | 19/55 (35)                  | 59/78 (76)                  |                      |

EMS-VAS, tender joint count, swollen joint count, painful joint count, physician MSK VAS, and the MSK-BILAG and MSK-SLEDAI-2K were all significantly worse in patients with ultrasound synovitis (all p<0.05). EMS duration was not significantly different between ultrasound groups (Table S1).

**Table S3: Baseline global SLE characteristics**

Population: Full analysis set

All values reported as median (IQR), range.

|                                        | All patients                             | US activity at baseline                 |                                         |                     |
|----------------------------------------|------------------------------------------|-----------------------------------------|-----------------------------------------|---------------------|
|                                        |                                          | Inactive                                | Active                                  |                     |
|                                        | N=133                                    | N=55                                    | N=78                                    |                     |
| <b>Physician global VAS (mm)</b>       | 34.0 (20.0, 51.0), 2.0 to 80.0           | 27.0 (15.0, 41.0), 2.0 to 77.0          | 41.0 (26.0, 56.0), 5.0 to 80.0          | z=-3.59,<br>p<0.001 |
| <b>General health VAS (mm)</b>         | 59.0 (46.0, 73.0), 4.0 to 97.0           | 52.0 (42.0, 71.0), 4.0 to 96.0          | 62.5 (47.0, 78.0), 7.0 to 97.0          | z=-1.77,<br>p=0.076 |
| <b>Abnormal fatigue VAS (mm)</b>       | 79.0 (61.0, 90.0), 0.0 to 100.0          | 75.0 (60.0, 86.0), 3.0 to 100.0         | 83.5 (65.0, 90.0), 0.0 to 100.0         | z=-1.62,<br>p=0.105 |
| <b>BILAG total score</b>               | 9.0 (2.0, 10.0), 0.0 to 26.0             | 2.0 (1.0, 10.0), 0.0 to 26.0            | 9.0 (8.0, 13.0), 1.0 to 26.0            | z=-3.38,<br>p=0.001 |
| <b>SLEDAI total score</b>              | 6.0 (2.0, 7.0), 0.0 to 16.0              | 4.0 (2.0, 6.0), 0.0 to 12.0             | 6.0 (4.0, 8.0), 0.0 to 16.0             | z=-3.04,<br>p=0.002 |
| <b>L-QoL score</b>                     | 17.0 (9.0, 21.0), 0.0 to 25.0,<br>n=132  | 15.0 (8.0, 20.0), 0.0 to 25.0,<br>n=55  | 17.0 (10.0, 21.0), 0.0 to 25.0,<br>n=77 | z=-0.90,<br>p=0.370 |
| <b>LUPUSQOL: Physical health</b>       | 40.6 (18.8, 65.6), 0.0 to 100.0          | 43.8 (21.9, 68.8), 0.0 to 100.0         | 37.5 (15.6, 59.4), 0.0 to 100.0         | z=0.83,<br>p=0.405  |
| <b>LUPUSQOL: Pain</b>                  | 33.3 (16.7, 66.7), 0.0 to 100.0          | 50.0 (16.7, 66.7), 0.0 to 91.7          | 33.3 (16.7, 58.3), 0.0 to 100.0         | z=1.36,<br>p=0.173  |
| <b>LUPUSQOL: Planning</b>              | 41.7 (16.7, 75.0), 0.0 to 100.0          | 50.0 (8.3, 75.0), 0.0 to 100.0          | 41.7 (25.0, 83.3), 0.0 to 100.0         | z=-0.10,<br>p=0.921 |
| <b>LUPUSQOL: Intimate relationship</b> | 25.0 (0.0, 75.0), 0.0 to 100.0,<br>n=109 | 31.3 (0.0, 75.0), 0.0 to 100.0,<br>n=50 | 25.0 (0.0, 75.0), 0.0 to 100.0,<br>n=59 | z=-0.26,<br>p=0.792 |
| <b>LUPUSQOL: Burden to others</b>      | 25.0 (8.3, 66.7), 0.0 to 100.0           | 25.0 (8.3, 62.5), 0.0 to 100.0          | 25.0 (0.0, 66.7), 0.0 to 100.0          | z=-0.10,<br>p=0.923 |
| <b>LUPUSQOL: Emotional health</b>      | 50.0 (29.2, 75.0), 0.0 to 100.0          | 54.2 (33.3, 75.0), 0.0 to 100.0         | 47.9 (29.2, 75.0), 0.0 to 100.0         | z=1.08,<br>p=0.279  |



USEFUL Study I: Musculoskeletal ultrasound identifies patients with lupus arthritis with better response to therapy: Supplementary material

|                             | All patients                           | US activity at baseline               |                                       |                 |
|-----------------------------|----------------------------------------|---------------------------------------|---------------------------------------|-----------------|
|                             |                                        | Inactive                              | Active                                |                 |
| <b>LUPUSQOL: Body image</b> | 50.0 (25.0, 83.3), 0.0 to 100.0, n=115 | 62.5 (25.0, 83.3), 0.0 to 100.0, n=47 | 45.0 (25.0, 75.6), 0.0 to 100.0, n=68 | z=1.20, p=0.229 |
| <b>LUPUSQOL: Fatigue</b>    | 25.0 (12.5, 50.0), 0.0 to 100.0        | 31.3 (6.3, 43.8), 0.0 to 81.3         | 25.0 (12.5, 50.0), 0.0 to 100.0       | z=0.34, p=0.734 |

**Table S4: Baseline SLE laboratory tests**

Population: Full analysis set

All values reported as median (IQR), range, except for antibody status, reported as n/N (%).

|                                        | All patients                          | US activity at baseline             |                                      |                     |
|----------------------------------------|---------------------------------------|-------------------------------------|--------------------------------------|---------------------|
|                                        |                                       | Inactive                            | Active                               |                     |
|                                        | N=133                                 | N=55                                | N=78                                 |                     |
| Erythrocyte sedimentation rate (mm/hr) | 13.9 (5.3, 26.7), 1.8 to 115.6        | 11.0 (5.3, 19.3), 1.8 to 69.3       | 17.1 (6.4, 34.2), 2.1 to 115.6       | z=-2.21, p=0.027    |
| C-reactive protein (mg/L)              | 4.0 (4.0, 7.1), 1.0 to 50.0           | 4.0 (4.0, 5.6), 1.0 to 35.0         | 4.0 (4.0, 9.0), 1.0 to 50.0          | z=-1.72, p=0.086    |
| C3 (g/l)                               | 1.3 (1.1, 1.4), 0.1 to 2.2            | 1.2 (1.1, 1.4), 0.1 to 2.0          | 1.3 (1.1, 1.5), 0.8 to 2.2           | z=-0.56, p=0.579    |
| C4 (g/l)                               | 0.2 (0.2, 0.3), 0.1 to 0.8            | 0.2 (0.2, 0.3), 0.1 to 0.8          | 0.2 (0.2, 0.3), 0.1 to 0.6           | z=0.64, p=0.524     |
| IgG titre (g/l)                        | 12.8 (10.3, 15.7), 1.8 to 37.0, n=132 | 11.3 (9.2, 15.3), 1.8 to 33.6, n=55 | 13.2 (11.8, 17.6), 4.1 to 37.0, n=77 | z=-3.07, p=0.002    |
| IgA titre (g/l)                        | 2.5 (2.0, 3.3), 0.8 to 16.7, n=131    | 2.6 (1.9, 3.3), 0.8 to 7.0, n=55    | 2.4 (2.0, 3.4), 0.9 to 16.7, n=76    | z=0.27, p=0.790     |
| IgM titre (g/l)                        | 0.9 (0.6, 1.4), 0.1 to 8.3, n=131     | 0.8 (0.5, 1.3), 0.1 to 2.0, n=55    | 1.0 (0.6, 1.5), 0.2 to 8.3, n=76     | z=-1.93, p=0.053    |
| ANA antibody                           |                                       |                                     |                                      |                     |
| Currently negative                     | 8/133 (6)                             | 3/55 (5)                            | 5/78 (6)                             | chisq=0.05, p=0.819 |
| Currently positive                     | 125/133 (94)                          | 52/55 (95)                          | 73/78 (94)                           |                     |
| Ro antibody                            |                                       |                                     |                                      |                     |
| Currently negative                     | 75/133 (56)                           | 28/55 (51)                          | 47/78 (60)                           | chisq=1.15, p=0.284 |
| Currently positive                     | 58/133 (44)                           | 27/55 (49)                          | 31/78 (40)                           |                     |
| La antibody                            |                                       |                                     |                                      |                     |

USEFUL Study I: Musculoskeletal ultrasound identifies patients with lupus arthritis with better response to therapy: Supplementary material

|                               | All patients | US activity at baseline |            |                        |
|-------------------------------|--------------|-------------------------|------------|------------------------|
|                               |              | Inactive                | Active     |                        |
| Currently negative            | 109/133 (82) | 44/55 (80)              | 65/78 (83) | chisq=0.24,<br>p=0.623 |
| Currently positive            | 24/133 (18)  | 11/55 (20)              | 13/78 (17) |                        |
| Sm antibody                   |              |                         |            |                        |
| Currently negative            | 107/133 (80) | 49/55 (89)              | 58/78 (74) | chisq=4.45,<br>p=0.035 |
| Currently positive            | 26/133 (20)  | 6/55 (11)               | 20/78 (26) |                        |
| RNP antibody                  |              |                         |            |                        |
| Currently negative            | 111/133 (83) | 50/55 (91)              | 61/78 (78) | chisq=3.77,<br>p=0.052 |
| Currently positive            | 22/133 (17)  | 5/55 (9)                | 17/78 (22) |                        |
| Anti-cardiolipin antibody     |              |                         |            |                        |
| Currently negative            | 119/132 (90) | 49/54 (91)              | 70/78 (90) | chisq=0.04,<br>p=0.850 |
| Currently positive            | 13/132 (10)  | 5/54 (9)                | 8/78 (10)  |                        |
| Anti-B2 glycoprotein antibody |              |                         |            |                        |
| Currently negative            | 119/129 (92) | 48/52 (92)              | 71/77 (92) | chisq=0.00,<br>p=0.983 |
| Currently positive            | 10/129 (8)   | 4/52 (8)                | 6/77 (8)   |                        |

Acute phase markers and lupus serology were associated with ultrasound findings. Median (IQR) ESR was 17.1 (2.1,115.6) in patients with ultrasound synovitis and 11.0 (5.3, 19.3) in patients with normal ultrasound (p=0.027). Also, consistent with our previous report [11], total serum IgG was associated with ultrasound synovitis. Normal range for IgG was 6.0 to 16.0 mg/L. Median (IQR) IgG was 13.2 (11.8, 17.6) in patients with ultrasound synovitis and 11.3 (9.2, 15.3) in patients with normal ultrasound (p=0.002). CRP did not differ by US activity status; most CRP values were normal, and this biomarker would therefore be unlikely to be clinically useful. Median (IQR) CRP was 4.0 (4.0, 9.0) in patients with ultrasound synovitis and 4.0 (4.0, 5.6) in patients with normal ultrasound (p=0.086). Ultrasound synovitis was also associated with Sm and RNP antibodies (Table S3).

**Table S5: Baseline BILAG comparison**

Population: Full analysis set

All values reported as median (IQR), range, unless otherwise stated. US activity is defined as GS>=2 and/or PD>0 in at least 1 joint.

|                                                | All patients                     | BILAG MSK score                  |                                  |                                    |
|------------------------------------------------|----------------------------------|----------------------------------|----------------------------------|------------------------------------|
|                                                |                                  | C                                | B                                | A                                  |
|                                                | N=133                            | N=67                             | N=52                             | N=14                               |
| <b>EMS VAS (mm)</b>                            | 73.0 (57.0, 87.0), 0.0 to 100.0  | 67.0 (49.0, 83.0), 3.0 to 99.0   | 75.0 (63.0, 89.0), 0.0 to 100.0  | 93.5 (66.0, 96.0), 21.0 to 100.0   |
| <b>EMS duration (mins)</b>                     | 90.0 (30.0, 120.0), 0.0 to 600.0 | 60.0 (30.0, 120.0), 0.0 to 360.0 | 90.0 (30.0, 135.0), 0.0 to 360.0 | 112.5 (90.0, 300.0), 30.0 to 600.0 |
| <b>Tender 68 joint count</b>                   | 17.0 (7.0, 28.0), 0.0 to 68.0    | 10.0 (4.0, 21.0), 0.0 to 61.0    | 20.5 (11.0, 32.0), 0.0 to 68.0   | 26.5 (21.0, 32.0), 8.0 to 68.0     |
| <b>Swollen 66 joint count</b>                  | 1.0 (0.0, 4.0), 0.0 to 32.0      | 0.0 (0.0, 0.0), 0.0 to 16.0      | 2.5 (1.0, 4.5), 0.0 to 16.0      | 8.0 (5.0, 16.0), 0.0 to 32.0       |
| <b>Patient painful joint count</b>             | 16.0 (9.0, 28.0), 0.0 to 42.0    | 12.0 (7.0, 23.0), 0.0 to 42.0    | 20.0 (14.0, 32.0), 1.0 to 42.0   | 27.0 (18.0, 40.0), 8.0 to 42.0     |
| <b>Physician MSK Disease Activity VAS (mm)</b> | 33.0 (21.0, 49.0), 0.0 to 90.0   | 26.0 (17.0, 36.0), 0.0 to 75.0   | 38.5 (29.5, 51.0), 14.0 to 77.0  | 65.5 (54.0, 68.0), 3.0 to 90.0     |
| <b>HAQ-DI score</b>                            | 1.4 (0.6, 2.0), 0.0 to 3.0       | 1.0 (0.3, 1.6), 0.0 to 2.8       | 1.5 (0.8, 2.1), 0.0 to 3.0       | 1.6 (1.3, 2.6), 0.8 to 2.9         |
| <b>Patient MSK disease activity VAS (mm)</b>   | 65.0 (32.0, 79.0), 2.0 to 95.0   | 54.0 (29.0, 77.0), 2.0 to 92.0   | 68.0 (31.5, 78.5), 2.0 to 95.0   | 76.0 (68.0, 89.0), 2.0 to 95.0     |
| <b>MSK pain VAS (mm)</b>                       | 63.0 (47.0, 74.0), 5.0 to 99.0   | 51.0 (33.0, 68.0), 5.0 to 90.0   | 69.0 (59.0, 75.0), 10.0 to 99.0  | 74.5 (68.0, 93.0), 57.0 to 99.0    |
| <b>Total grey scale (joints)</b>               | 5.0 (2.0, 9.0), 0.0 to 49.0      | 4.0 (0.0, 6.0), 0.0 to 17.0      | 7.0 (4.0, 9.5), 0.0 to 30.0      | 11.0 (2.0, 30.0), 0.0 to 49.0      |

USEFUL Study I: Musculoskeletal ultrasound identifies patients with lupus arthritis with better response to therapy: Supplementary material

|                                                   | All patients                | BILAG MSK score            |                             |                             |
|---------------------------------------------------|-----------------------------|----------------------------|-----------------------------|-----------------------------|
|                                                   |                             | C                          | B                           | A                           |
|                                                   | N=133                       | N=67                       | N=52                        | N=14                        |
| <b>Total power Doppler (joints)</b>               | 0.0 (0.0, 1.0), 0.0 to 34.0 | 0.0 (0.0, 0.0), 0.0 to 3.0 | 0.0 (0.0, 1.0), 0.0 to 10.0 | 1.5 (1.0, 9.0), 0.0 to 34.0 |
| <b>Total osteophyte (joints)</b>                  | 0.0 (0.0, 0.0), 0.0 to 19.0 | 0.0 (0.0, 0.0), 0.0 to 4.0 | 0.0 (0.0, 1.0), 0.0 to 19.0 | 0.0 (0.0, 3.0), 0.0 to 9.0  |
| <b>US activity in joints at baseline, n/N (%)</b> |                             |                            |                             |                             |
| <b>Inactive</b>                                   | 55/133 (41)                 | 42/67 (63)                 | 10/52 (19)                  | 3/14 (21)                   |
| <b>Active</b>                                     | 78/133 (59)                 | 25/67 (37)                 | 42/52 (81)                  | 11/14 (79)                  |
| <b>Total grey scale (tendons)</b>                 | 0.0 (0.0, 1.0), 0.0 to 21.0 | 0.0 (0.0, 0.0), 0.0 to 5.0 | 0.0 (0.0, 2.0), 0.0 to 9.0  | 0.0 (0.0, 2.0), 0.0 to 21.0 |
| <b>Total power Doppler (tendons)</b>              | 0.0 (0.0, 0.0), 0.0 to 20.0 | 0.0 (0.0, 0.0), 0.0 to 2.0 | 0.0 (0.0, 0.5), 0.0 to 6.0  | 0.0 (0.0, 1.0), 0.0 to 20.0 |

**Table S6: Baseline SLEDAI comparison**

Population: Full analysis set

All values reported as median (IQR), range, unless otherwise stated. US activity is defined as GS>=2 and/or PD>0 in at least 1 joint.

|                                                   | All patients                     | SLEDAI MSK domain score          |                                  |
|---------------------------------------------------|----------------------------------|----------------------------------|----------------------------------|
|                                                   |                                  | 0                                | 4                                |
|                                                   | N=133                            | N=55                             | N=78                             |
| <b>EMS VAS (mm)</b>                               | 73.0 (57.0, 87.0), 0.0 to 100.0  | 67.0 (46.0, 83.0), 0.0 to 99.0   | 76.5 (63.0, 90.0), 11.0 to 100.0 |
| <b>EMS duration (mins)</b>                        | 90.0 (30.0, 120.0), 0.0 to 600.0 | 60.0 (30.0, 120.0), 0.0 to 360.0 | 90.0 (30.0, 150.0), 0.0 to 600.0 |
| <b>Tender 68 joint count</b>                      | 17.0 (7.0, 28.0), 0.0 to 68.0    | 10.0 (4.0, 26.0), 0.0 to 47.0    | 20.5 (10.0, 32.0), 0.0 to 68.0   |
| <b>Swollen 66 joint count</b>                     | 1.0 (0.0, 4.0), 0.0 to 32.0      | 0.0 (0.0, 1.0), 0.0 to 8.0       | 3.0 (1.0, 7.0), 0.0 to 32.0      |
| <b>Patient painful joint count</b>                | 16.0 (9.0, 28.0), 0.0 to 42.0    | 12.0 (7.0, 20.0), 0.0 to 40.0    | 22.5 (14.0, 34.0), 1.0 to 42.0   |
| <b>Physician MSK Disease Activity VAS (mm)</b>    | 33.0 (21.0, 49.0), 0.0 to 90.0   | 26.0 (16.0, 33.0), 0.0 to 58.0   | 41.5 (27.0, 56.0), 3.0 to 90.0   |
| <b>HAQ-DI score</b>                               | 1.4 (0.6, 2.0), 0.0 to 3.0       | 1.0 (0.3, 1.5), 0.0 to 2.3       | 1.5 (0.9, 2.1), 0.0 to 3.0       |
| <b>Patient MSK disease activity VAS (mm)</b>      | 65.0 (32.0, 79.0), 2.0 to 95.0   | 62.0 (36.0, 75.0), 7.0 to 95.0   | 69.0 (29.0, 81.0), 2.0 to 95.0   |
| <b>MSK pain VAS (mm)</b>                          | 63.0 (47.0, 74.0), 5.0 to 99.0   | 52.0 (34.0, 71.0), 5.0 to 94.0   | 68.0 (55.0, 75.0), 10.0 to 99.0  |
| <b>Total grey scale (joints)</b>                  | 5.0 (2.0, 9.0), 0.0 to 49.0      | 2.0 (0.0, 5.0), 0.0 to 12.0      | 7.0 (5.0, 10.0), 0.0 to 49.0     |
| <b>Total power Doppler (joints)</b>               | 0.0 (0.0, 1.0), 0.0 to 34.0      | 0.0 (0.0, 0.0), 0.0 to 1.0       | 0.0 (0.0, 2.0), 0.0 to 34.0      |
| <b>Total osteophyte (joints)</b>                  | 0.0 (0.0, 0.0), 0.0 to 19.0      | 0.0 (0.0, 0.0), 0.0 to 5.0       | 0.0 (0.0, 0.0), 0.0 to 19.0      |
| <b>US activity in joints at baseline, n/N (%)</b> |                                  |                                  |                                  |

USEFUL Study I: Musculoskeletal ultrasound identifies patients with lupus arthritis with better response to therapy: Supplementary material

|                                      | <b>All patients</b>         | <b>SLEDAI MSK domain score</b> |                             |
|--------------------------------------|-----------------------------|--------------------------------|-----------------------------|
| <b>Inactive</b>                      | 55/133 (41)                 | 36/55 (65)                     | 19/78 (24)                  |
| <b>Active</b>                        | 78/133 (59)                 | 19/55 (35)                     | 59/78 (76)                  |
| <b>Total grey scale (tendons)</b>    | 0.0 (0.0, 1.0), 0.0 to 21.0 | 0.0 (0.0, 0.0), 0.0 to 5.0     | 0.0 (0.0, 1.0), 0.0 to 21.0 |
| <b>Total power Doppler (tendons)</b> | 0.0 (0.0, 0.0), 0.0 to 20.0 | 0.0 (0.0, 0.0), 0.0 to 2.0     | 0.0 (0.0, 0.0), 0.0 to 20.0 |

**Figure S1: Likert Scale responses**

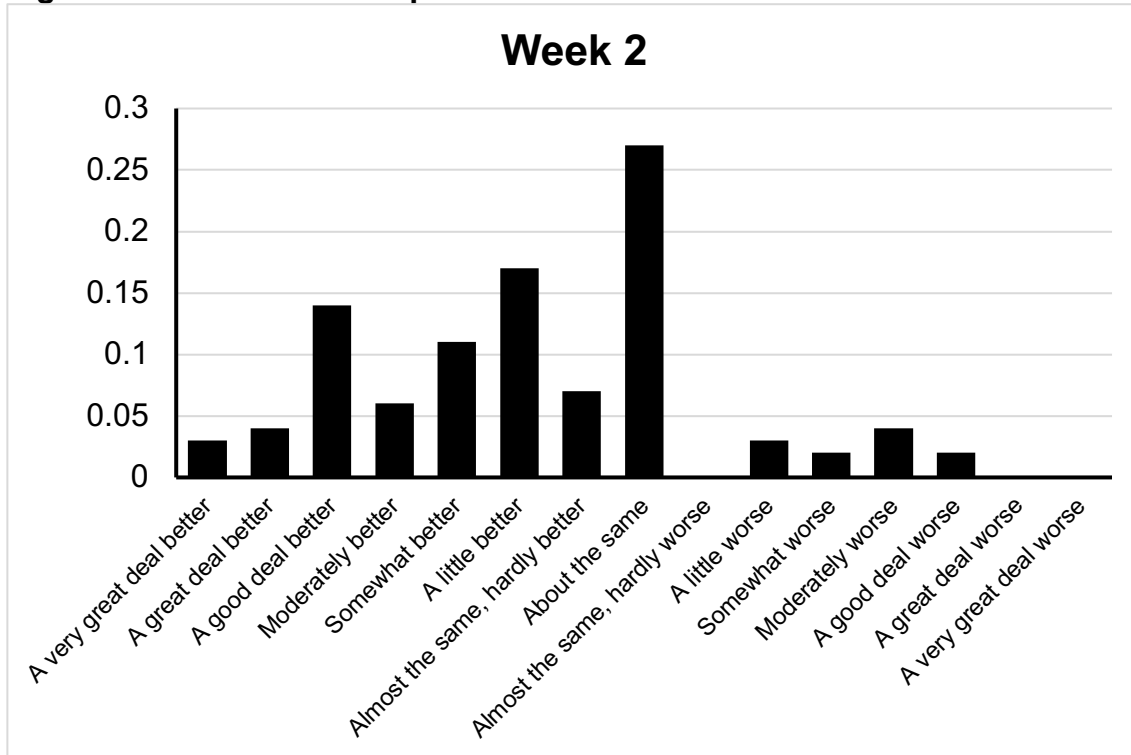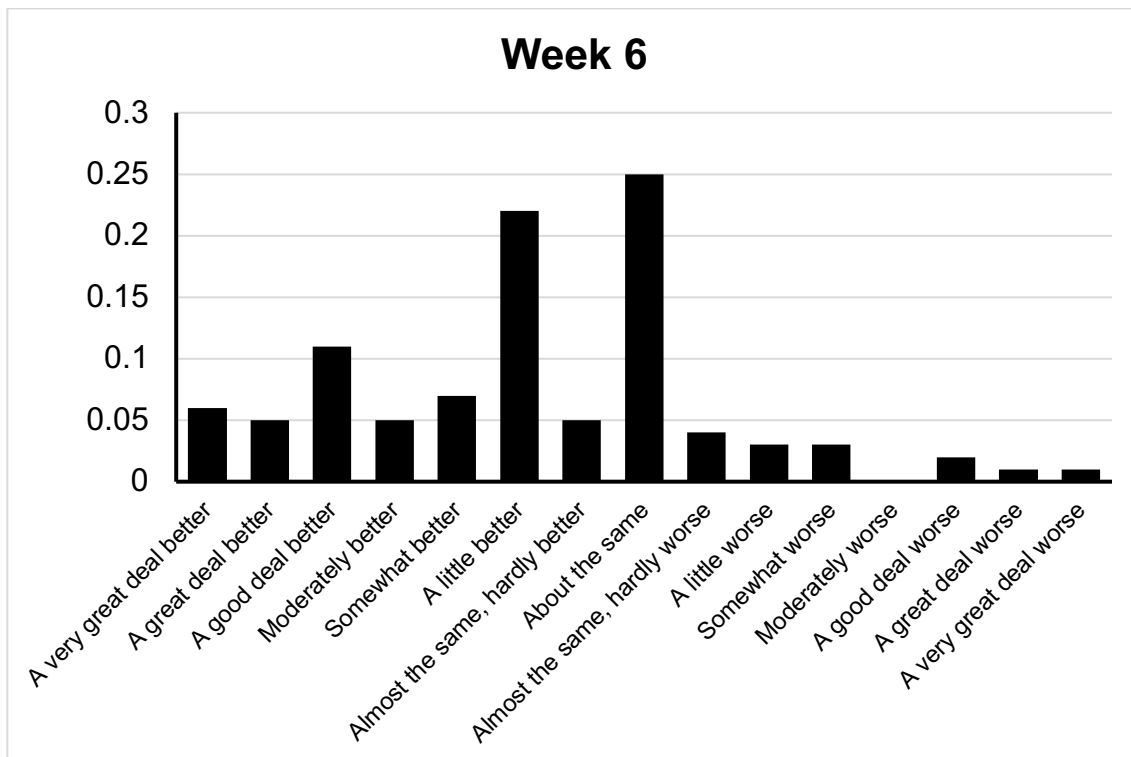



**Table S7: Primary endpoint EMS-VAS at week 2**

| Population              | US activity at baseline |                    | Difference between medians (95% CI) |                                    |                                    |
|-------------------------|-------------------------|--------------------|-------------------------------------|------------------------------------|------------------------------------|
|                         | Inactive median (SE)    | Active median (SE) | Unadjusted                          | Adjusted primary*, P value         | Adjusted sensitivity**, P value    |
| Full Analysis Set (FAS) | 57.75 (4.09)            | 58.60 (5.86)       | 0.85 (-7.06, 8.76)                  | -7.70 (-18.92, 3.52),<br>p=0.178   | -6.31 (-18.10, 5.49),<br>p=0.293   |
| Per Protocol (PP)       | 58.00 (3.97)            | 59.00 (5.75)       | 1.00 (-4.88, 6.88)                  | -7.51 (-17.13, 2.11),<br>p=0.126   | -6.30 (-16.83, 4.24),<br>p=0.241   |
| FAS: No fibromyalgia    | 56.30 (4.53)            | 51.40 (6.01)       | -4.90 (-15.36, 5.56)                | -12.08 (-24.11, -0.06),<br>p=0.049 | -12.82 (-22.20, -3.44),<br>p=0.007 |
| PP: No fibromyalgia     | 57.00 (3.24)            | 50.00 (6.87)       | -7.00 (-20.16, 6.16)                | -12.30 (-22.76, -1.85),<br>p=0.021 | -14.78 (-20.75, -8.80),<br>p<0.001 |

\*Adjusted for baseline EMS-VAS \*\*Also adjusted for immunosuppressant and oral steroid use. EMS=Early morning stiffness; VAS=Visual analogue scale

**Table S8: Secondary Clinical Outcomes at 2 weeks**

| Variable                        | US activity at baseline |                    | Difference between medians (95% CI) |                                |                                 |
|---------------------------------|-------------------------|--------------------|-------------------------------------|--------------------------------|---------------------------------|
|                                 | Inactive median (SE)    | Active median (SE) | Unadjusted                          | Adjusted primary*, P value     | Adjusted sensitivity**, P value |
| Tender 68 joint count           | 4.90 (0.79)             | 10.95 (1.65)       | 6.05 (2.74, 9.36)                   | -0.57 (-2.31, 1.17), p=0.521   | -0.66 (-2.31, 0.99), p=0.427    |
| Swollen 66 joint count          | -0.00 (0.67)            | 1.00 (0.96)        | 1.00 (0.18, 1.82)                   | 0.00 (-0.67, 0.67), p=0.995    | 0.00 (-0.67, 0.67), p=0.995     |
| Patient painful joint count     | 6.50 (0.99)             | 14.50 (1.76)       | 8.00 (4.87, 11.13)                  | -0.93 (-4.44, 2.58), p=0.602   | -0.76 (-4.49, 2.96), p=0.686    |
| Physician MSK DA VAS (mm)       | 12.75 (1.79)            | 25.40 (2.47)       | 12.65 (7.85, 17.45)                 | 7.07 (1.38, 12.77), p=0.015    | 7.08 (2.61, 11.55), p=0.002     |
| HAQ-DI                          | 1.16 (0.20)             | 1.32 (0.16)        | 0.16 (-0.18, 0.50)                  | 0.01 (-0.05, 0.07), p=0.681    | 0.01 (-0.06, 0.09), p=0.746     |
| Patient MSK DA VAS (mm)         | 48.45 (2.75)            | 48.10 (3.04)       | -0.35 (-8.23, 7.53)                 | -1.58 (-10.11, 6.95), p=0.715  | -4.16 (-13.73, 5.42), p=0.391   |
| Patient MSK Pain VAS (mm)       | 41.95 (5.16)            | 54.20 (2.51)       | 12.25 (3.61, 20.89)                 | 2.48 (-7.55, 12.50), p=0.627   | 1.05 (-10.94, 13.04), p=0.864   |
| EMS (mins)                      | 60.00 (17.87)           | 60.50 (11.75)      | 0.50 (-24.04, 25.04)                | -4.16 (-19.44, 11.12), p=0.594 | 0.13 (-10.82, 11.09), p=0.981   |
| Total GSPD (joints)             | -0.00 (0.52)            | 3.95 (1.32)        | 3.95 (2.09, 5.81)                   | 0.25 (-1.60, 2.09), p=0.793    | 0.25 (-1.60, 2.09), p=0.793     |
| Total GSPD (tendons)>0          | -0.00 (0.14)            | 2.80 (1.24)        | 2.80 (0.50, 5.10)                   | 1.96 (0.88, 3.04), p=0.001     | 1.79 (-0.11, 3.68), p=0.064     |
| Physician's global VAS (mm)     | 15.60 (1.96)            | 26.65 (1.67)       | 11.05 (6.27, 15.83)                 | 6.99 (2.55, 11.43), p=0.003    | 7.02 (2.71, 11.33), p=0.002     |
| Patient general health VAS (mm) | 49.70 (2.54)            | 54.10 (5.16)       | 4.40 (-4.80, 13.60)                 | 2.19 (-10.02, 14.40), p=0.725  | 0.92 (-10.52, 12.36), p=0.874   |
| Abnormal fatigue VAS (mm)       | 64.80 (2.50)            | 71.45 (1.59)       | 6.65 (1.02, 12.28)                  | -0.38 (-6.14, 5.38), p=0.897   | -0.87 (-7.08, 5.35), p=0.784    |

Population: Full Analysis Set. Due to low numbers of patients scoring >0, groups were compared at the 90th percentile instead of the median for total GSPD (tendons).

\*Adjusted for baseline EMS VAS \*\*Also adjusted for immunosuppressant and oral steroid use. EMS=Early morning stiffness; VAS=Visual analogue scale

**Table S9: Secondary Clinical Outcomes at 6 weeks**

| Variable                        | US activity at baseline |                    | Difference between medians (95% CI) |                                |                                 |
|---------------------------------|-------------------------|--------------------|-------------------------------------|--------------------------------|---------------------------------|
|                                 | Inactive median (SE)    | Active median (SE) | Unadjusted                          | Adjusted primary*, P value     | Adjusted sensitivity**, P value |
| Tender 68 joint count           | 6.90 (2.01)             | 12.55 (2.34)       | 5.65 (-0.15, 11.45)                 | -0.17 (-3.20, 2.86), p=0.913   | 0.03 (-2.80, 2.86), p=0.985     |
| Swollen 66 joint count          | 3.45 (1.72)             | 6.55 (1.84)        | 3.10 (-0.58, 6.78)                  | 1.04 (-3.96, 6.04), p=0.682    | 0.80 (-2.15, 3.75), p=0.586     |
| Patient painful joint count     | 8.15 (1.98)             | 13.10 (1.89)       | 4.95 (0.67, 9.23)                   | -2.54 (-5.71, 0.62), p=0.115   | -1.80 (-4.83, 1.22), p=0.242    |
| Physician MSK DA VAS (mm)       | 10.90 (1.69)            | 27.15 (4.72)       | 16.25 (7.41, 25.09)                 | 3.43 (-3.37, 10.24), p=0.317   | 4.19 (-3.15, 11.54), p=0.257    |
| HAQ-DI                          | 0.97 (0.24)             | 1.29 (0.17)        | 0.33 (-0.14, 0.79)                  | -0.04 (-0.23, 0.15), p=0.665   | -0.01 (-0.13, 0.10), p=0.836    |
| Patient MSK DA VAS (mm)         | 52.55 (4.24)            | 46.05 (4.61)       | -6.50 (-20.50, 7.50)                | -5.75 (-18.85, 7.34), p=0.385  | -3.83 (-15.76, 8.10), p=0.527   |
| Patient MSK Pain VAS (mm)       | 55.05 (3.45)            | 61.75 (3.61)       | 6.70 (-3.74, 17.14)                 | 2.12 (-6.07, 10.31), p=0.611   | 1.98 (-6.30, 10.26), p=0.638    |
| EMS VAS (mm)                    | 60.15 (3.65)            | 66.30 (3.39)       | 6.15 (-2.07, 14.37)                 | -0.34 (-7.96, 7.27), p=0.928   | -2.71 (-9.87, 4.44), p=0.450    |
| EMS (mins)                      | 42.25 (11.50)           | 86.00 (18.36)      | 43.75 (13.59, 73.91)                | 6.92 (-8.20, 22.03), p=0.365   | 8.81 (-9.37, 26.99), p=0.338    |
| Total GSPD (joints)             | -0.00 (0.60)            | 4.30 (1.82)        | 4.30 (1.53, 7.07)                   | 0.29 (-2.82, 3.41), p=0.853    | 0.39 (-2.41, 3.18), p=0.786     |
| Total GSPD (tendons)            | 1.80 (0.55)             | 6.45 (1.58)        | 4.65 (1.46, 7.84)                   | 3.75 (-0.39, 7.89), p=0.076    | 3.42 (0.41, 6.42), p=0.026      |
| Physician's global VAS (mm)     | 13.85 (2.75)            | 28.00 (4.83)       | 14.15 (2.21, 26.09)                 | 4.63 (-3.36, 12.63), p=0.249   | 4.31 (-3.56, 12.18), p=0.277    |
| Patient general health VAS (mm) | 58.25 (3.11)            | 52.20 (2.93)       | -6.05 (-14.13, 2.03)                | -3.00 (-9.35, 3.34), p=0.352   | -5.85 (-17.93, 6.22), p=0.342   |
| Abnormal fatigue VAS (mm)       | 68.10 (3.95)            | 73.70 (4.86)       | 5.60 (-6.82, 18.02)                 | -0.85 (-14.41, 12.70), p=0.899 | -0.71 (-15.60, 14.19), p=0.925  |

Population: Full Analysis Set. Due to low numbers of patients scoring >0, groups were compared at the 90th percentile instead of the median for SJC66 and at the 96th percentile for total GSPD

(tendons). \*Adjusted for baseline EMS VAS \*\*Also adjusted for immunosuppressant and oral steroid use. EMS=Early morning stiffness; VAS=Visual analogue scale

**Table S10: Simple comparison of changes at 2 weeks (in all patients)**

| Variable                        | Change by US activity at baseline |                    | Difference between medians (95% CI) |
|---------------------------------|-----------------------------------|--------------------|-------------------------------------|
|                                 | Inactive median (SE)              | Active median (SE) | Unadjusted                          |
| EMS VAS                         | -6.30 (4.05)                      | -18.65 (5.18)      | -12.35 (-19.85, -4.85), p=0.001     |
| Tender 68 joint count           | -3.05 (0.95)                      | -5.90 (0.81)       | -2.85 (-4.43, -1.27), p<0.001       |
| Swollen 66 joint count          | 0.00 (0.87)                       | -1.05 (1.32)       | -1.05 (-2.47, 0.37), p=0.147        |
| Patient painful joint count     | -2.40 (1.17)                      | -4.35 (1.32)       | -1.95 (-5.39, 1.49), p=0.261        |
| Physician MSK DA VAS (mm)       | -8.85 (1.62)                      | -16.65 (2.06)      | -7.80 (-11.90, -3.70), p<0.001      |
| HAQ-DI                          | -0.01 (0.19)                      | -0.13 (0.08)       | -0.12 (-0.39, 0.15), p=0.390        |
| Patient MSK DA VAS (mm)         | -5.95 (2.53)                      | -13.95 (4.23)      | -8.00 (-19.51, 3.51), p=0.173       |
| Patient MSK Pain VAS (mm)       | -6.35 (2.50)                      | -10.40 (2.41)      | -4.05 (-10.60, 2.50), p=0.225       |
| EMS (mins)                      | 0.00 (16.54)                      | -9.25 (3.87)       | -9.25 (-45.25, 26.75), p=0.614      |
| Total GSPD (joints)             | 0.00 (1.60)                       | -3.10 (0.89)       | -3.10 (-6.07, -0.13), p=0.041       |
| Total GSPD (tendons)            | -0.00 (0.16)                      | 1.10 (0.61)        | 1.10 (-0.03, 2.23), p=0.057         |
| Physician's global VAS (mm)     | -9.70 (2.15)                      | -12.10 (1.55)      | -2.40 (-6.34, 1.54), p=0.231        |
| Total BILAG score               | 0.00 (1.99)                       | -1.25 (1.31)       | -1.25 (-5.37, 2.87), p=0.551        |
| Total SLEDAI score              | 0.00 (1.34)                       | 0.00 (1.41)        | 0.00 (-0.61, 0.61), p=1.000         |
| Patient general health VAS (mm) | -2.85 (2.04)                      | -4.45 (4.04)       | -1.60 (-10.64, 7.44), p=0.728       |
| Abnormal fatigue VAS (mm)       | -3.00 (1.13)                      | -5.20 (2.09)       | -2.20 (-7.25, 2.85), p=0.392        |
| L-QoL                           | 0.00 (1.10)                       | -0.35 (0.90)       | -0.35 (-1.93, 1.23), p=0.662        |

Population: Full Analysis Set. Due to low numbers of patients scoring >0, groups were compared at the 90th percentile instead of the median for total GSPD (tendons). Improvement in SLEDAI MSK was adjusted for total SLEDAI at baseline rather than SLEDAI MSK to prevent perfect prediction (improvement was only possible if SLEDAI MSK=4 at baseline). DA=Disease activity; EMS=Early morning stiffness; GSPD=combined grey scale and power Doppler score; MSK=Musculoskeletal; US=Ultrasound; VAS=Visual analogue scale

**Table S11: Simple comparison of changes at 2 weeks (in patients without fibromyalgia)**

| Variable                        | Change by US activity at baseline |                    | Difference between medians (95% CI) |
|---------------------------------|-----------------------------------|--------------------|-------------------------------------|
|                                 | Inactive median (SE)              | Active median (SE) | Unadjusted                          |
| EMS VAS                         | -5.10 (4.36)                      | -19.55 (4.57)      | -14.45 (-22.29, -6.61), p<0.001     |
| Tender 68 joint count           | -2.70 (1.52)                      | -6.80 (0.86)       | -4.10 (-7.75, -0.45), p=0.028       |
| Swollen 66 joint count          | 0.00 (0.82)                       | -1.00 (0.34)       | -1.00 (-2.06, 0.06), p=0.065        |
| Patient painful joint count     | -2.90 (1.05)                      | -5.90 (1.47)       | -3.00 (-7.06, 1.06), p=0.146        |
| Physician MSK DA VAS (mm)       | -8.45 (1.33)                      | -18.75 (2.07)      | -10.30 (-14.72, -5.88), p<0.001     |
| HAQ-DI                          | 0.00 (0.09)                       | -0.13 (0.06)       | -0.13 (-0.22, -0.03), p=0.009       |
| Patient MSK DA VAS (mm)         | -9.55 (3.14)                      | -14.50 (5.78)      | -4.95 (-17.44, 7.54), p=0.436       |
| Patient MSK Pain VAS (mm)       | -4.05 (3.17)                      | -12.45 (2.49)      | -8.40 (-16.67, -0.13), p=0.047      |
| EMS (mins)                      | 0.00 (18.61)                      | -10.00 (7.36)      | -10.00 (-49.77, 29.77), p=0.622     |
| Total GSPD (joints)             | -0.00 (1.34)                      | -3.15 (0.64)       | -3.15 (-6.04, -0.26), p=0.033       |
| Total GSPD (tendons)            | -0.00 (0.18)                      | 1.00 (0.13)        | 1.00 (0.74, 1.26), p<0.001          |
| Physician's global VAS (mm)     | -9.70 (1.66)                      | -15.50 (2.04)      | -5.80 (-10.18, -1.42), p=0.010      |
| Total BILAG score               | 0.00 (1.92)                       | -3.55 (2.37)       | -3.55 (-9.45, 2.35), p=0.232        |
| Total SLEDAI score              | 0.00 (1.15)                       | 0.00 (1.56)        | 0.00 (-0.99, 0.99), p=1.000         |
| Patient general health VAS (mm) | 1.70 (2.86)                       | -5.90 (3.48)       | -7.60 (-14.21, -0.99), p=0.025      |
| Abnormal fatigue VAS (mm)       | -2.20 (1.51)                      | -5.05 (2.39)       | -2.85 (-7.79, 2.09), p=0.258        |
| L-QoL                           | -0.30 (1.07)                      | -1.00 (0.53)       | -0.70 (-2.29, 0.89), p=0.385        |

Population: Full Analysis Set (restricted to patients without fibromyalgia, n=101). Due to low numbers of patients scoring >0, groups were compared at the 90th percentile instead of the median for total GSPD (tendons). Improvement in SLEDAI MSK was adjusted for total SLEDAI at baseline rather than SLEDAI MSK to prevent perfect prediction (improvement was only possible if SLEDAI MSK=4 at baseline). DA=Disease activity; EMS=Early morning stiffness; GSPD=combined grey scale and power Doppler score; MSK=Musculoskeletal; US=Ultrasound; VAS=Visual analogue scale

**Table S12: Simple comparison of changes at 6 weeks (in all patients)**

| Variable                        | Change by US activity at baseline |                    | Difference between medians (95% CI) |
|---------------------------------|-----------------------------------|--------------------|-------------------------------------|
|                                 | Inactive median (SE)              | Active median (SE) | Unadjusted                          |
| EMS VAS                         | -9.25 (3.06)                      | -10.90 (2.76)      | -1.65 (-10.69, 7.39), p=0.720       |
| Tender 68 joint count           | -2.05 (1.99)                      | -4.55 (1.31)       | -2.50 (-6.85, 1.85), p=0.260        |
| Swollen 66 joint count          | 0.00 (0.91)                       | -1.00 (0.88)       | -1.00 (-2.25, 0.25), p=0.117        |
| Patient painful joint count     | -1.50 (1.64)                      | -7.00 (1.33)       | -5.50 (-9.68, -1.32), p=0.010       |
| Physician MSK DA VAS (mm)       | -9.85 (1.41)                      | -14.40 (2.39)      | -4.55 (-10.36, 1.26), p=0.124       |
| HAQ-DI                          | 0.00 (0.17)                       | -0.12 (0.07)       | -0.12 (-0.37, 0.14), p=0.362        |
| Patient MSK DA VAS (mm)         | -4.50 (3.82)                      | -14.50 (3.05)      | -10.00 (-20.49, 0.49), p=0.061      |
| Patient MSK Pain VAS (mm)       | -4.15 (2.53)                      | -6.40 (3.14)       | -2.25 (-10.04, 5.54), p=0.567       |
| EMS (mins)                      | 0.00 (22.90)                      | -1.50 (16.37)      | -1.50 (-26.56, 23.56), p=0.907      |
| Total GSPD (joints)             | 0.00 (1.98)                       | -3.15 (0.97)       | -3.15 (-7.26, 0.96), p=0.133        |
| Total GSPD (tendons)            | 0.30 (0.74)                       | 2.05 (1.73)        | 1.75 (-1.44, 4.94), p=0.281         |
| Physician's global VAS (mm)     | -8.75 (1.87)                      | -11.05 (2.53)      | -2.30 (-8.71, 4.11), p=0.475        |
| Total BILAG score               | -0.05 (2.38)                      | -1.70 (1.01)       | -1.65 (-6.68, 3.38), p=0.520        |
| Total SLEDAI score              | -0.60 (1.37)                      | -1.95 (1.20)       | -1.35 (-3.96, 1.26), p=0.311        |
| Patient general health VAS (mm) | -1.90 (2.72)                      | -5.40 (2.64)       | -3.50 (-10.56, 3.56), p=0.331       |
| Abnormal fatigue VAS (mm)       | -0.10 (2.75)                      | -4.45 (2.82)       | -4.35 (-11.41, 2.71), p=0.223       |
| LUPUSQoL: Physical health       | 5.16 (4.79)                       | -0.63 (2.37)       | -5.78 (-14.53, 2.97), p=0.195       |
| LUPUSQoL: Pain                  | 7.92 (3.38)                       | 3.75 (5.57)        | -4.17 (-15.57, 7.24), p=0.467       |
| LUPUSQoL: Planning              | 0.00 (2.43)                       | 0.00 (6.45)        | 0.00 (-9.27, 9.27), p=1.000         |
| LUPUSQoL: Intimate relationship | 0.00 (8.85)                       | 0.00 (10.09)       | 0.00 (-6.82, 6.82), p=1.000         |
| LUPUSQoL: Burden to others      | 8.33 (3.67)                       | -0.00 (4.61)       | -8.33 (-15.41, -1.26), p=0.021      |
| LUPUSQoL: Emotional health      | 0.00 (3.96)                       | -1.46 (3.24)       | -1.46 (-9.52, 6.60), p=0.722        |
| LUPUSQoL: Body image            | 0.25 (4.12)                       | -1.29 (4.71)       | -1.54 (-10.15, 7.06), p=0.725       |
| LUPUSQoL: Fatigue               | 0.00 (2.52)                       | 0.00 (3.91)        | 0.00 (-5.05, 5.05), p=1.000         |
| L-QoL                           | -0.55 (1.46)                      | -0.90 (0.72)       | -0.35 (-2.71, 2.01), p=0.771        |
|                                 | Change by US activity at baseline |                    | Odds ratio (95% CI)                 |
|                                 | Inactive %                        | Active %           | Unadjusted                          |
| BILAG MSK improved              | 32%                               | 51%                | 2.15 (1.10, 4.17), p=0.024          |
| SLEDAI MSK improved             | 22%                               | 38%                | 2.17 (1.41, 3.35), p<0.001          |

Population: Full Analysis Set. Due to low numbers of patients scoring >0, groups were compared at the 90th percentile instead of the median for total GSPD (tendons). Improvement in SLEDAI MSK was adjusted for total SLEDAI at baseline rather than SLEDAI MSK to prevent perfect prediction (improvement was only possible if SLEDAI MSK=4 at baseline). DA=Disease activity; EMS=Early morning stiffness; GSPD=combined grey scale and power Doppler score; MSK=Musculoskeletal; US=Ultrasound; VAS=Visual analogue scale

**Table S13: Simple comparison of changes at 6 weeks (in patients without fibromyalgia)**

| Variable                        | Change by US activity at baseline |                    | Difference between medians (95% CI) |
|---------------------------------|-----------------------------------|--------------------|-------------------------------------|
|                                 | Inactive median (SE)              | Active median (SE) | Unadjusted                          |
| EMS VAS                         | -9.90 (3.33)                      | -9.45 (2.23)       | 0.45 (-7.08, 7.98), p=0.907         |
| Tender 68 joint count           | -2.60 (1.96)                      | -5.20 (1.23)       | -2.60 (-7.35, 2.15), p=0.282        |
| Swollen 66 joint count          | 0.00 (0.81)                       | -0.95 (0.35)       | -0.95 (-2.44, 0.54), p=0.210        |
| Patient painful joint count     | -0.80 (1.81)                      | -7.35 (1.56)       | -6.55 (-10.78, -2.32), p=0.003      |
| Physician MSK DA VAS (mm)       | -9.25 (1.98)                      | -15.60 (2.20)      | -6.35 (-13.26, 0.56), p=0.072       |
| HAQ-DI                          | 0.00 (0.15)                       | -0.11 (0.06)       | -0.11 (-0.36, 0.14), p=0.382        |
| Patient MSK DA VAS (mm)         | -7.00 (3.39)                      | -14.60 (3.30)      | -7.60 (-17.36, 2.16), p=0.125       |
| Patient MSK Pain VAS (mm)       | -2.35 (4.68)                      | -6.60 (2.64)       | -4.25 (-14.33, 5.83), p=0.407       |
| EMS (mins)                      | 0.00 (17.25)                      | 0.00 (9.47)        | 0.00 (-20.46, 20.46), p=1.000       |
| Total GSPD (joints)             | -0.00 (2.06)                      | -3.40 (0.76)       | -3.40 (-7.64, 0.84), p=0.116        |
| Total GSPD (tendons)            | 1.10 (0.83)                       | 3.80 (1.69)        | 2.70 (-0.62, 6.02), p=0.111         |
| Physician's global VAS (mm)     | -8.60 (2.75)                      | -14.85 (2.69)      | -6.25 (-14.02, 1.52), p=0.113       |
| Total BILAG score               | -0.00 (2.67)                      | -2.75 (0.92)       | -2.75 (-8.33, 2.83), p=0.334        |
| Total SLEDAI score              | 0.00 (1.11)                       | -1.80 (0.82)       | -1.80 (-4.08, 0.48), p=0.121        |
| Patient general health VAS (mm) | -1.45 (2.75)                      | -4.30 (2.58)       | -2.85 (-10.12, 4.42), p=0.442       |
| Abnormal fatigue VAS (mm)       | -1.05 (3.79)                      | -2.85 (2.60)       | -1.80 (-10.33, 6.73), p=0.671       |
| LUPUSQoL: Physical health       | 6.09 (3.61)                       | -0.94 (2.15)       | -7.03 (-15.29, 1.23), p=0.095       |
| LUPUSQoL: Pain                  | 7.92 (3.37)                       | 1.67 (4.03)        | -6.25 (-16.00, 3.50), p=0.204       |
| LUPUSQoL: Planning              | 0.83 (3.37)                       | -0.00 (3.98)       | -0.83 (-8.21, 6.55), p=0.823        |
| LUPUSQoL: Intimate relationship | 0.00 (7.56)                       | 0.00 (7.07)        | 0.00 (-4.93, 4.93), p=1.000         |
| LUPUSQoL: Burden to others      | 8.33 (1.60)                       | 0.00 (3.25)        | -8.33 (-13.70, -2.96), p=0.002      |
| LUPUSQoL: Emotional health      | -0.00 (3.88)                      | 0.42 (3.23)        | 0.42 (-8.17, 9.00), p=0.924         |
| LUPUSQoL: Body image            | 0.00 (5.98)                       | -2.17 (4.73)       | -2.17 (-12.72, 8.38), p=0.686       |
| LUPUSQoL: Fatigue               | 0.31 (2.69)                       | 0.00 (3.13)        | -0.31 (-5.18, 4.56), p=0.899        |
| L-QoL                           | -0.45 (1.34)                      | -0.95 (0.50)       | -0.50 (-2.68, 1.68), p=0.652        |
|                                 | Change by US activity at baseline |                    | Odds ratio (95% CI)                 |
|                                 | Inactive %                        | Active %           | Unadjusted                          |
| BILAG MSK improved              | 26%                               | 56%                | 3.74 (2.03, 6.90), p<0.001          |
| SLEDAI MSK improved             | 15%                               | 37%                | 3.24 (1.62, 6.50), p=0.001          |

Population: Full Analysis Set (restricted to patients without fibromyalgia, n=101). Due to low numbers of patients scoring >0, groups were compared at the 95th percentile instead of the median for total GSPD (tendons). Improvement in SLEDAI MSK was adjusted for total SLEDAI at baseline rather than SLEDAI MSK to prevent perfect prediction (improvement was only possible if SLEDAI MSK=4 at baseline). DA=Disease activity; EMS=Early morning stiffness; GSPD=combined grey scale and power Doppler score; MSK=Musculoskeletal; US=Ultrasound; VAS=Visual analogue scale

## References for Supplement

1. Isenberg DA, Rahman A, Allen E, Farewell V, Akil M, Bruce IN, et al. BILAG 2004. Development and initial validation of an updated version of the British Isles Lupus Assessment Group's disease activity index for patients with systemic lupus erythematosus. *Rheumatology (Oxford, England)*. 2005 Jul; 44(7):902-906.
2. Gladman DD, Ibanez D, Urowitz MB. Systemic lupus erythematosus disease activity index 2000. *The Journal of rheumatology*. 2002 Feb; 29(2):288-291.
3. Wolfe F, Clauw DJ, Fitzcharles MA, Goldenberg DL, Katz RS, Mease P, et al. The American College of Rheumatology preliminary diagnostic criteria for fibromyalgia and measurement of symptom severity. *Arthritis care & research*. 2010; 62(5):600-610.
4. Fries JF, Spitz PW, Young DY. The dimensions of health outcomes: the health assessment questionnaire, disability and pain scales. *The Journal of rheumatology*. 1982 Sep-Oct; 9(5):789-793.
5. McElhone K, Abbott J, Shelmerdine J, Bruce IN, Ahmad Y, Gordon C, et al. Development and validation of a disease-specific health-related quality of life measure, the LupusQoL, for adults with systemic lupus erythematosus. *Arthritis care & research*. 2007; 57(6):972-979.
6. Doward L, McKenna S, Whalley D, Tennant A, Griffiths B, Emery P, et al. The development of the L-QoL: a quality-of-life instrument specific to systemic lupus erythematosus. *Annals of the rheumatic diseases*. 2009; 68(2):196-200.
7. Zayat AS, Md Yusof MY, Wakefield RJ, Conaghan PG, Emery P, Vital EM. The role of ultrasound in assessing musculoskeletal symptoms of systemic lupus erythematosus: a systematic literature review. *Rheumatology (Oxford, England)*. 2016 Mar; 55(3):485-494.
8. Mahmoud K, Zayat A, Vital EM. Musculoskeletal manifestations of systemic lupus erythematosus. *Current opinion in rheumatology*. 2017 Sep; 29(5):486-492.
9. Mahmoud K, Zayat AS, Yusof Y, Hensor E, Conaghan PG, Emery P, et al. Responsiveness of clinical and ultrasound outcome measures in musculoskeletal systemic lupus erythematosus. *Rheumatology*. 2019.
10. Zayat AS, Mahmoud K, Yusof M, Yuzaiful M, Mukherjee S, D'Agostino M-A, et al. Defining inflammatory musculoskeletal manifestations in systemic lupus erythematosus. *Rheumatology*. 2018.
11. Zayat AS, Mahmoud K, Md Yusof MY, Mukherjee S, D'agostino M-a, Hensor EM, et al. Defining inflammatory musculoskeletal manifestations in systemic lupus erythematosus. *Rheumatology*. 2018; 58(2):304-312.
